# Supplementary material for: TheDrosophilaLIN54 homolog Mip120 controls two aspects of oogenesis
Source: Oxford University Press journal article supplement (doi:10.1242/bio.025825), 2017-01-01
Supplement: bio025825supp.pdf [file bio025825supp.pdf]

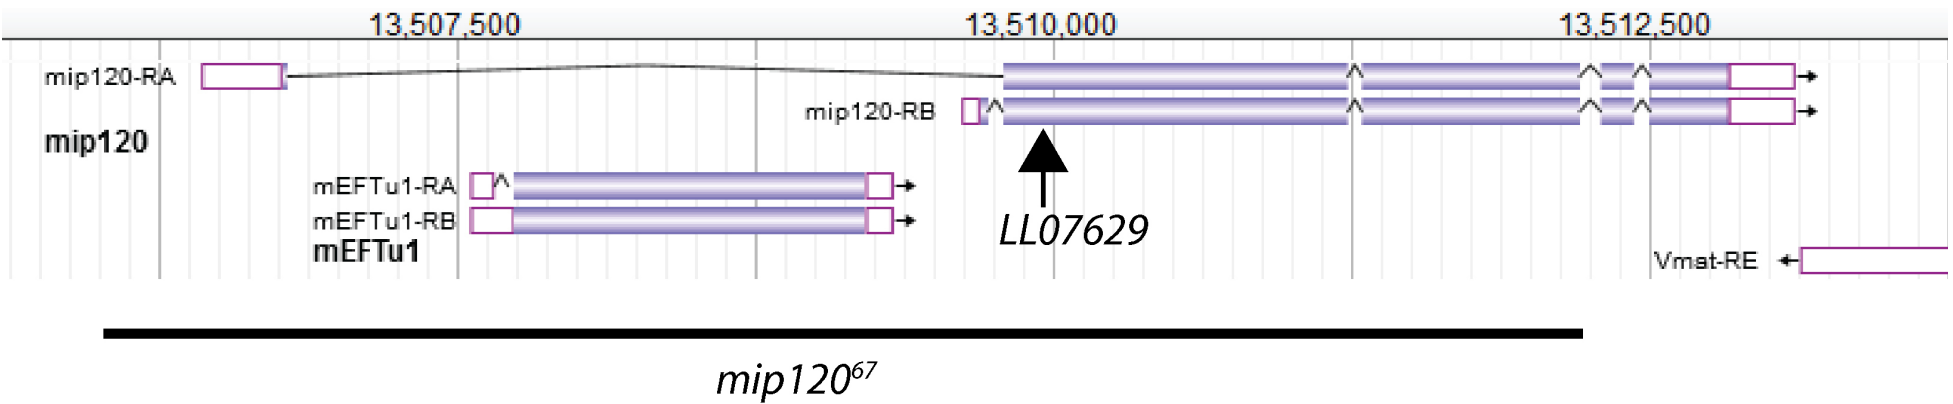

**Supplementary Figure S1. Structure of the *Drosophila melanogaster mip120* locus.** A schematic diagram of *mip120* region was generated using the JBrowse viewer in FlyBase [<http://flybase.org/reports/FBgn0033846.html>]. Boxes indicate exons. Purple shading indicates open reading frames. Nucleotide numbers for chromosome arm 2R are shown above. The black bar below indicates the extent of the deletion in *mip120*<sup>67</sup>. The large upward arrow indicates the location of the piggyBac transposon insertion in *mip120*<sup>LL07629</sup>.

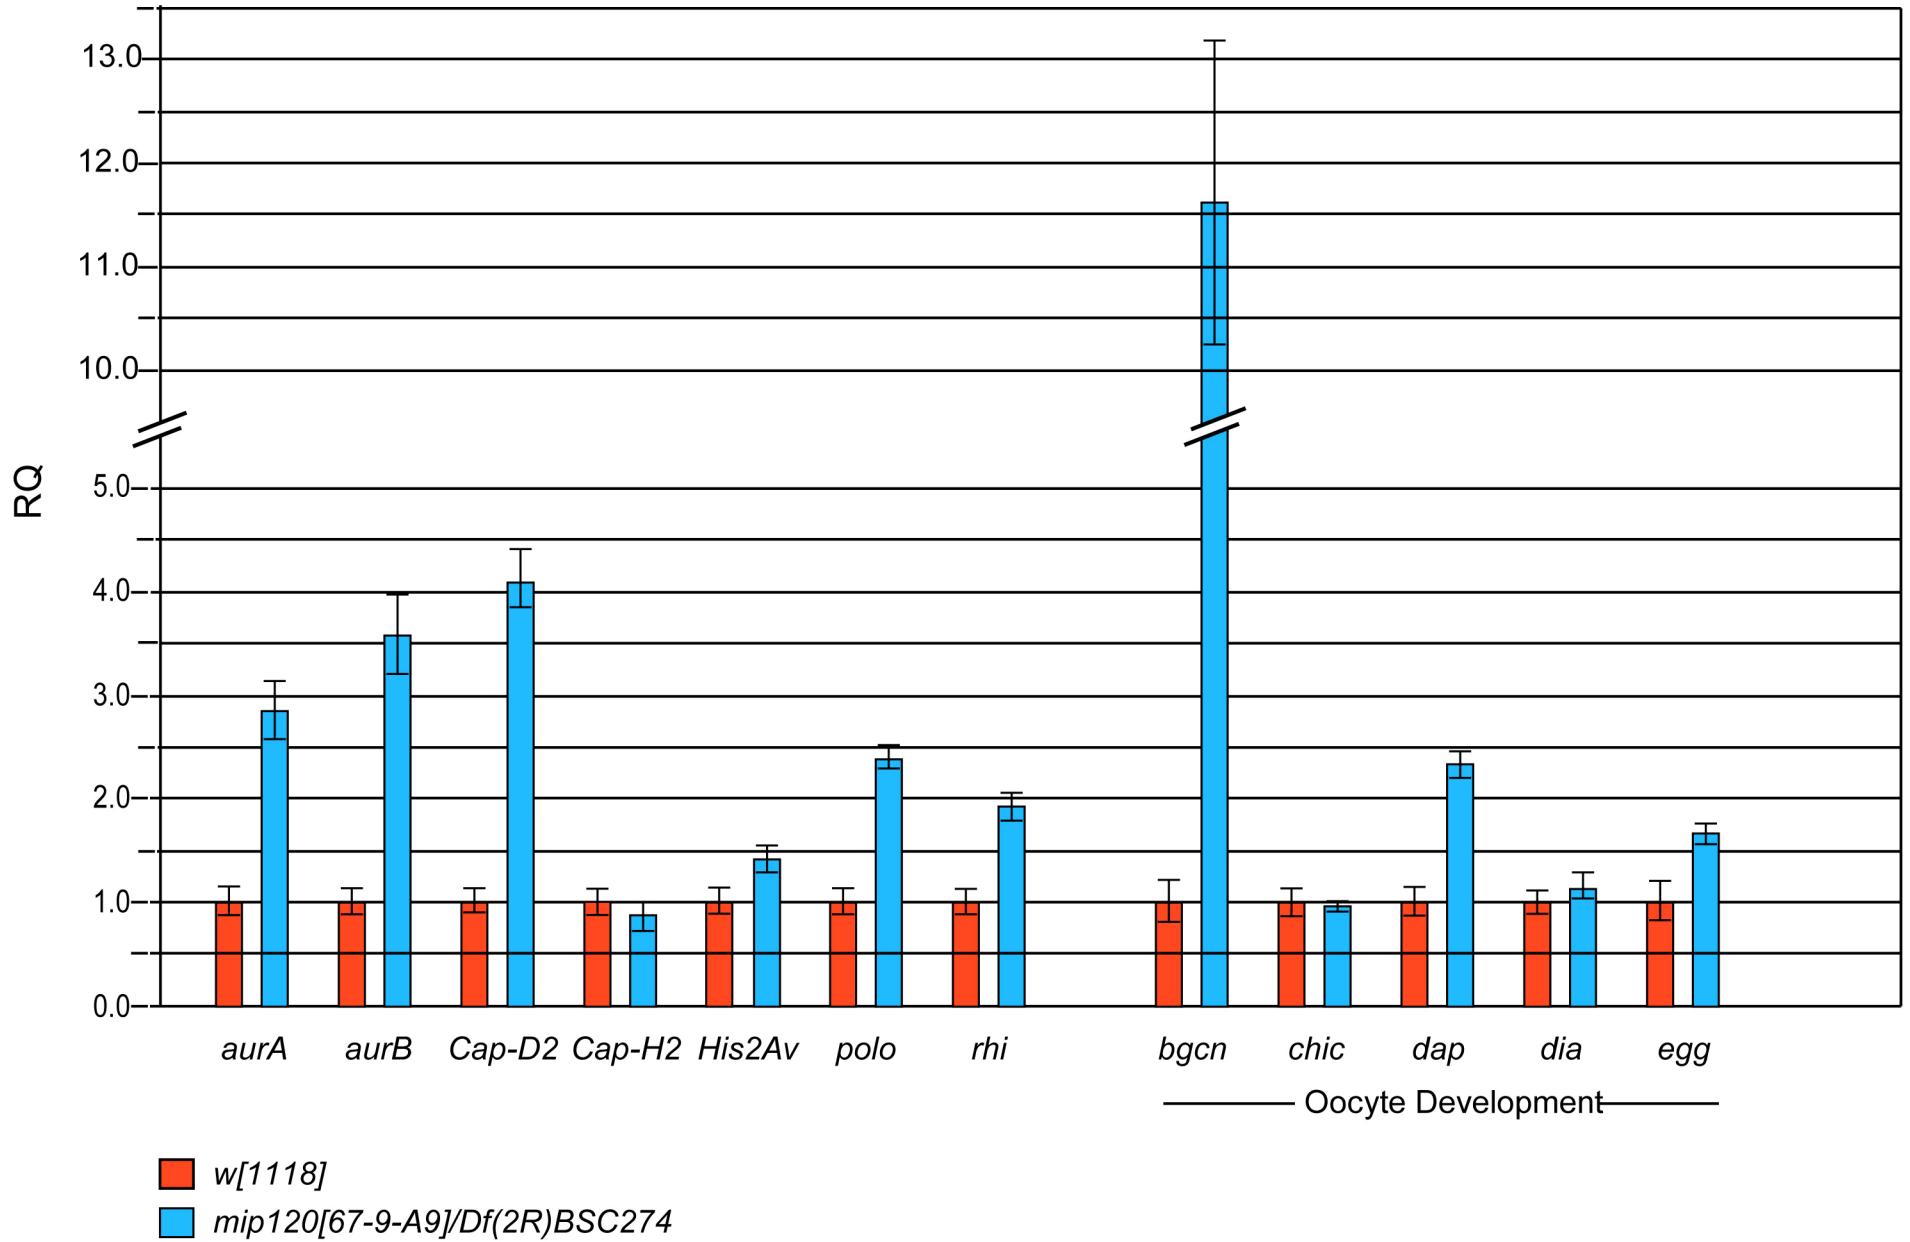

**Supplementary Figure S2. Alterations in gene expression in *mip120* null ovaries.** Ovaries from *mip120*<sup>WT</sup> control (*w*<sup>1118</sup>) and *mip120*<sup>67-9a-9</sup> / *Df(2R)BSC274* mutant females were dissected and qPCR was used to quantitate RNA levels the indicated genes. The five genes marked as “Oocyte Development” were identified from a bioinformatics screen for promoter occupancy by Mip120 but not Myb, followed by a DAVID search for “gamete generation” or “oogenesis”. Errors bars indicate RQ min and RQ max values for three technical replicates.

**Table S1. Identification and rescue of a new *mip120* mutant allele.**

Test crosses mated *mip120<sup>LL07629</sup>*, *Cy+*/*CyO* virgin parental females with the parental males indicated below.

|                                                                                                | males                   | males                  | females                 | females                | males                   | males      | females                 | females    |          |         |
|------------------------------------------------------------------------------------------------|-------------------------|------------------------|-------------------------|------------------------|-------------------------|------------|-------------------------|------------|----------|---------|
|                                                                                                | <i>Cy</i> <sup>+</sup>  | <i>Cy</i> <sup>+</sup> | <i>Cy</i> <sup>+</sup>  | <i>Cy</i> <sup>+</sup> | <i>Cy</i>               | <i>Cy</i>  | <i>Cy</i>               | <i>Cy</i>  |          |         |
|                                                                                                | <i>Ser</i> <sup>+</sup> | <i>Ser</i>             | <i>Ser</i> <sup>+</sup> | <i>Ser</i>             | <i>Ser</i> <sup>+</sup> | <i>Ser</i> | <i>Ser</i> <sup>+</sup> | <i>Ser</i> | Escapers | Rescued |
| Parental Males                                                                                 | F1                      | F1                     | F1                      | F1                     | F1                      | F1         | F1                      | F1         | NA       | NA      |
| <i>Df(2R)BSC274 / CyO</i>                                                                      | 0                       | NA                     | 4                       | NA                     | 13                      | NA         | 30                      | NA         | 9%       | NA      |
| <i>mip120<sup>67-9-A9</sup> / CyO,ActGFP</i>                                                   | 0                       | NA                     | 6 *                     | NA                     | 75                      | NA         | 83                      | NA         | 4%       | NA      |
| <i>mip120<sup>67-9-A</sup> / CyO;</i><br><i>P{Cherry-mip120<sup>WT</sup>} / TM3,Ser,ActGFP</i> | 19                      | 0                      | 16 **                   | 1                      | 54                      | 23         | 37                      | 38         | 1%       | 19%     |

NA = not applicable

\* Sterile

\*\*Fertile

Escapers may be overestimated because of incomplete expressivity of *Cy*.

Expected rescue in the cross in the bottom row is 20% of viable progeny as shown below.

Parents: *mip120<sup>LL07629</sup> / CyO* x *mip120<sup>67-9-A9</sup> / CyO; P{Cherry-mip120<sup>WT</sup>} / TM3,Ser,ActGFP*

*mip120<sup>LL07629</sup> / mip120<sup>67-9-A9</sup>* → *P{Cherry-mip120<sup>WT</sup>} / +* (12.5% => viable)  
 ↘ *TM3,Ser,ActGFP / +* (12.5% => dead)

*mip120<sup>LL07629</sup> / CyO* (25% => viable)

*mip120<sup>67-9-A9</sup> / CyO* (25% => viable)

*CyO / CyO* (25% => dead)

Expected rescue offspring among viable progeny = 12.5% / (12.5% + 25% + 25%) = 20%

**Table S2. Predicted Protein Size and Extent of Mip120 Mutants**

| <b>Protein</b>        | <b>Predicted MW</b> | <b>Amino Acids of Mip120</b> |
|-----------------------|---------------------|------------------------------|
| Mip120                | 100,020             | 1-950                        |
| mCherry-Mip120-WT     | 126,965             | 1-950                        |
| mCherry-Mip120-N-Term | 84,545              | 1-570                        |
| mCherry-Mip120-C-Term | 69,383              | 571-950                      |
| mCherry-Mip120-CXC    | 42,847              | 727-860                      |
| mCherry-Mip120-HCH    | 36,885              | 865-950                      |
| Conserved CXC Domain  | NA                  | 738-848                      |
| Conserved HCH Domain  | NA                  | 885-930                      |

**Table S3**

| Gene Symbol | FlyBase ID  | Sequence              | Tm C | Product length | Intron Spanned |
|-------------|-------------|-----------------------|------|----------------|----------------|
| aTub84B_FWD | FBgn0003884 | GCCTCATAGCCGGCAGTTCG  | 67   | 185bp          | Exon1 - Exon2  |
| aTub84B_REV |             | CTCCCAGCAGGCGTTTCCAA  | 67   |                |                |
| aurA_FWD    | FBgn0000147 | GCTCCGCACAGAATGCCAGA  | 67   | 210bp          | Exon1 - Exon2  |
| aurA_REV    |             | CGGCACCATGGGTTTTTGGGA | 67   |                |                |
| aurB_FWD    | FBgn0024227 | ACGCCAACCGCAACCACCT   | 68   | 195bp          | Exon1 - Exon2  |
| aurB_REV    |             | GCTCCCGCGCAAGTAGACA   | 68   |                |                |
| bam_FWD     | FBgn0000158 | TCACCGGGCCAAAGCAGAAG  | 67   | 200bp          | Exon1 - Exon2  |
| bam_REV     |             | AAGCCCAAATCGGCGGTTCAG | 67   |                |                |
| bam_FWD     | FBgn0000158 | CGGAAACTCGGGGAGCAATG  | 67   | 200bp          | Exon2 - Exon3  |
| bam_REV     |             | CGGCACCGGACAAAAGGATG  | 67   |                |                |
| bgn_FWD     | FBgn0004581 | AGAGCGCCAAGCCGGATTTTC | 68   | 190bp          | Exon1 - Exon2  |
| bgn_REV     |             | TCCTGCAGGCTGCCAGTGAG  | 68   |                |                |
| bgn_FWD     | FBgn0004581 | GCTTCCGCACACCGTGGATT  | 68   | 200bp          | Exon3 - Exon4  |
| bgn_REV     |             | CTCCGCCGTAGCCTTGACA   | 68   |                |                |
| Cap-D2_FWD  | FBgn0039680 | AGAAGCGTGCCAAGCCATCG  | 68   | 201bp          | Exon2 - Exon3  |
| Cap-D2_REV  |             | CCATGCGAAGCGGCAAAAGT  | 68   |                |                |
| Cap-H2_REV  | FBgn0037831 | GAACCCGGCTCCCCCTGTAG  | 67   | 202bp          | Exon6 - Exon7  |
| Cap-H2_FWD  |             | TGGCGCTCGCGTCAGTAAA   | 67   |                |                |
| chic_FWD    | FBgn0000308 | CCGCTTGTGCGACGGTCACTC | 66   | 223bp          | Exon1 - Exon2  |
| chic_REV    |             | TGTTTGTCTGGGTGCGGATT  | 66   |                |                |
| dia_FWD     | FBgn0011202 | CGGGCGTGGAGGACTTTGAG  | 67   | 201bp          | Exon1 - Exon2  |
| dia_REV     |             | TTGGCGCTACGCTCCAGTGA  | 67   |                |                |
| dap_FWD     | FBgn0010316 | TGGCATGCGGTCGTAGTTG   | 67   | 200bp          | Exon1 - Exon2  |
| dap_REV     |             | GCTGACGCGCTCCCAAATGT  | 67   |                |                |
| egg_FWD     | FBgn0086908 | CGTGTCCGGTGGCACACAAA  | 67   | 202bp          | Exon3 - Exon4  |
| egg_REV     |             | TTCCGTTGATGGCGGTGCT   | 67   |                |                |
| Gapdh2_FWD  | FBgn0001092 | GGCGCTGCCAGAACATCAT   | 67   | 201bp          | Exon2 - Exon2  |
| Gapdh2_REV  |             | GTTGGCGCCTCCTGAACCT   | 67   |                |                |
| His2Av_FWD  | FBgn0001197 | TGGCGGTAAAGCAGGCAAGG  | 66   | 190bp          | Exon2 - Exon3  |
| His2Av_REV  |             | CTCGGCGGTCAGGTATTCCAA | 66   |                |                |
| mip120_FWD  | FBgn0033846 | AGCATTGTGCCGCTGCCTTC  | 68   | 188bp          | Exon2 - Exon3  |
| mip120_REV  |             | CTGCTGACCGAGGCCGATTG  | 68   |                |                |
| polo_FWD    | FBgn0003124 | TCGCCGGCAAGATCGTATCC  | 66   | 228bp          | Exon2 - Exon3  |
| polo_REV    |             | AGCGGCATTGAACTCCGTAA  | 66   |                |                |
| rhi_FWD     | FBgn0004400 | TGGAGCGTTTTTCCGAACGA  | 68   | 193bp          | Exon1 - Exon1  |
| rhi_REV     |             | AGCTGCTGGGGCCATTCTCG  | 68   |                |                |
| tomB_FWD    | FBgn0031715 | CAACATGCCATCGCCAAGA   | 67   | 206bp          | Exon1 - Exon2  |
| tomB_REV    |             | CCACCAACTCGCGCACCTCT  | 67   |                |                |
| tut_FWD     | FBgn0052364 | CCGCGGTGGATTGTGGAAGT  | 67   | 200bp          | Exon2 - Exon3  |
| tut_REV     |             | TCGCGATTGTTGGTTCGATGG | 67   |                |                |
| tut_FWD     | FBgn0052364 | GGCCAGCGAACTGGGTGAAG  | 68   | 186bp          | Exon2 - Exon3  |
| tut_REV     |             | TCGCGATTGTTGGTTCGATGG | 68   |                |                |
